# Supplementary material for: Utilization of insecticide treated bed net and associated factors among households of Kola Diba town, North Gondar, Amhara region, Ethiopia
Source: PubMed Central journal article supplement (PMC6090723; doi:10.1186/s13104-018-3697-7), 2018-08-13
Supplement: 13104_2018_3697_MOESM1_ESM.pdf [file 13104_2018_3697_MOESM1_ESM.pdf]

## Questioner

| <b>Part 1</b> |                                            | <b>Sociodemographic characteristics</b> |  |
|---------------|--------------------------------------------|-----------------------------------------|--|
| 1             | Interviewee relation to the household head | 1. Household head (Mother, Father...)   |  |
|               |                                            | 2. child                                |  |
|               |                                            | 3. servant                              |  |
|               |                                            | 4. others, specify-----                 |  |
| 2             | Age                                        |                                         |  |
| 3             | Sex                                        |                                         |  |
| 4             | Occupation                                 |                                         |  |
| 5             | Family size                                |                                         |  |
| 6             | Religion                                   |                                         |  |

| <b>Part 2</b> |                                              | <b>ITN utilization in the household</b>                         |                           |
|---------------|----------------------------------------------|-----------------------------------------------------------------|---------------------------|
| 1             | What is your housing structure?              | 1. Hut<br>2. Made of mud<br>3. Made of cement<br>4. Other ----- |                           |
| 2             | How many rooms does your house have?         | _____                                                           |                           |
| 3             | Does all family members have a bed?          | 1. Yes<br>2. No                                                 |                           |
| 4             | If yes to Q3, how many beds are there?       |                                                                 |                           |
| 5             | Do you use bed nets in this family?          | 1. Yes<br>2. No                                                 | <i>If no, skip to #15</i> |
| 6             | Does all beds have bed net?                  | 1. Yes<br>2. No                                                 |                           |
| 7             | Do you use the bed net when you go to sleep? | 1. Yes<br>2. No                                                 |                           |
| 8             | Do you cover yourself well?                  | 1. Yes<br>2. No                                                 |                           |
| 9             | How many bed nets are there in this family?  | 1. Over 3<br>2. 3<br>3. 2<br>4. 1                               |                           |
| 10            | Who decides whom to sleep under bed nets?    | 1. Father<br>2. Mother<br>3. Other, specify .....               |                           |

|               |                                                                                                           |                                                                                                                                                                                                                                                                                  |                           |
|---------------|-----------------------------------------------------------------------------------------------------------|----------------------------------------------------------------------------------------------------------------------------------------------------------------------------------------------------------------------------------------------------------------------------------|---------------------------|
| 11            | If there are no enough bed nets, to whom do you give priority?                                            | <ol style="list-style-type: none"> <li>1. For children under 5</li> <li>2. For pregnant mother</li> <li>3. For lactating mother</li> <li>4. For head of households</li> <li>5. Other, specify-----</li> </ol>                                                                    |                           |
| 13            | In which season doses the family use bed nets more frequently?                                            | <ol style="list-style-type: none"> <li>1. Spring</li> <li>2. Summer</li> <li>3. Autumn</li> <li>4. Winter</li> </ol>                                                                                                                                                             |                           |
| 14            | Do you use bed net in the previous night?                                                                 | <ol style="list-style-type: none"> <li>1. Yes</li> <li>2. No</li> </ol>                                                                                                                                                                                                          |                           |
| 15            | If your answer is no, why don't you use the bed net?                                                      | <ol style="list-style-type: none"> <li>1. Doesn't protect from malaria</li> <li>2. Creates high temperature</li> <li>3. Causes skin irritation</li> <li>4. It takes time to make the bed net</li> <li>5. The mosquito may not bite us</li> <li>6. Other, specify-----</li> </ol> |                           |
| <b>Part 3</b> | <b>Knowledge, Attitude and Perception</b>                                                                 |                                                                                                                                                                                                                                                                                  |                           |
| 1             | Do you know ways of transmission of malaria?                                                              | <ol style="list-style-type: none"> <li>1. Yes</li> <li>2. No</li> </ol>                                                                                                                                                                                                          | <i>If no, skip to #3</i>  |
| 2             | If yes to Q1, what are they?                                                                              | .....<br>.....                                                                                                                                                                                                                                                                   |                           |
| 3             | Do you know prevention method of malaria?                                                                 | .....<br>.....                                                                                                                                                                                                                                                                   | <i>If no, skip to #5</i>  |
| 4             | If your answer is yes, what are they?                                                                     | .....<br>.....                                                                                                                                                                                                                                                                   |                           |
| 5             | Do you know insecticide treated bed nets?                                                                 | <ol style="list-style-type: none"> <li>1. Yes</li> <li>2. No</li> </ol>                                                                                                                                                                                                          |                           |
| 6             | Do you have chemically treated bed net in the households?                                                 | <ol style="list-style-type: none"> <li>1. Yes</li> <li>2. No</li> </ol>                                                                                                                                                                                                          | <i>If no, skip to #11</i> |
| 7             | Do you know the difference between chemically treated and untreated bed nets?                             | <ol style="list-style-type: none"> <li>1. Yes</li> <li>2. No</li> </ol>                                                                                                                                                                                                          |                           |
| 8             | If yes, what is the difference?                                                                           | .....<br>.....                                                                                                                                                                                                                                                                   |                           |
| 9             | Where did you get the information about the difference between chemically treated and untreated bed nets? | <ol style="list-style-type: none"> <li>1. Radio</li> <li>2. Health professionals</li> <li>3. Friends</li> <li>4. Pastor</li> <li>5. TV/video</li> <li>6. Newspaper</li> <li>7. Others.....</li> </ol>                                                                            |                           |

|               |                                                                                          |                                                                                                                                                                                          |  |
|---------------|------------------------------------------------------------------------------------------|------------------------------------------------------------------------------------------------------------------------------------------------------------------------------------------|--|
| 10            | What is your opinion about the used of chemically treated bed net and malaria prevention | <ol style="list-style-type: none"> <li>1. Very effective</li> <li>2. Effective</li> <li>3. Neutral</li> <li>4. Less effective</li> <li>5. Ineffective</li> </ol>                         |  |
| 11            | Why didn't you use chemically treated bed net                                            | <p>.....</p> <p>.....</p>                                                                                                                                                                |  |
| 12            | Do you treat the bed net with chemicals?                                                 | <ol style="list-style-type: none"> <li>1. Yes</li> <li>2. No</li> </ol>                                                                                                                  |  |
| 13            | Do you know how often the bed nets must be chemically treated?                           | <ol style="list-style-type: none"> <li>1. Yes</li> <li>2. No</li> </ol>                                                                                                                  |  |
| 14            | If yes, how often?                                                                       | .....                                                                                                                                                                                    |  |
| 15            | Do you think treated bed nets may useful for malaria prevention?                         | <ol style="list-style-type: none"> <li>1. Yes</li> <li>2. No</li> </ol>                                                                                                                  |  |
| 16            | If yes, explain why?                                                                     | <p>.....</p> <p>.....</p>                                                                                                                                                                |  |
| 17            | If no, list reasons?                                                                     | .....                                                                                                                                                                                    |  |
| <b>Part 4</b> | <b>ITN Availability</b>                                                                  |                                                                                                                                                                                          |  |
| 1             | Is there a place where you can get bed nets?                                             | <ol style="list-style-type: none"> <li>1. Yes</li> <li>2. No</li> </ol>                                                                                                                  |  |
| 2             | Where did you get the bed nets you are using now in the family?                          | <ol style="list-style-type: none"> <li>1. Government</li> <li>2. NGOS</li> <li>3. Pharmacy</li> <li>4. Supermarket</li> <li>5. Mini market</li> <li>6. Kiosk</li> <li>7. ....</li> </ol> |  |
| 3             | How much does one bed net costs?                                                         | ..... ETB                                                                                                                                                                                |  |
| 4             | How does the bed net distribute to the household?                                        | <ol style="list-style-type: none"> <li>1. By number of family</li> <li>2. By number of rooms</li> <li>3. By number of beds</li> <li>4. Other, specify-----</li> </ol>                    |  |
| 5             | Have you ever treated your bed net chemically?                                           | <ol style="list-style-type: none"> <li>1. Yes</li> <li>2. No</li> </ol>                                                                                                                  |  |
| 6             | If you don't, why?                                                                       | <p>.....</p> <p>.....</p>                                                                                                                                                                |  |
| 7             | If yes, when is the last time you treated your bed net?                                  | <ol style="list-style-type: none"> <li>1. 1 year ago</li> <li>2. 6 month ago</li> <li>3. 3 month ago</li> <li>4. Every month</li> </ol>                                                  |  |

|    |                                                                  |                                                             |  |
|----|------------------------------------------------------------------|-------------------------------------------------------------|--|
|    |                                                                  | 5. -----                                                    |  |
| 8  | Do you treat the bed net by yourself or you go to treating site? | 1. By myself<br>2. treating sight                           |  |
| 9  | Do you know the bed net chemical treating site?                  | 1. Yes<br>2. No                                             |  |
| 10 | How much time it takes to do to treating sight?                  | 10 minute<br>10-20 minute<br>20-30 minute<br>over 30 minute |  |
| 11 | How much it cost to treat the bed net with chemical?             | .....ET. birr                                               |  |
