# Supplementary material for: Utilization of insecticide treated bed net and associated factors among households of Kola Diba town, North Gondar, Amhara region, Ethiopia
Source: PubMed Central journal article supplement (PMC6090723; doi:10.1186/s13104-018-3697-7), 2018-08-13
Supplement: 13104_2018_3697_MOESM2_ESM.pdf [file 13104_2018_3697_MOESM2_ESM.pdf]

Table S1: Household and bed net characteristics of the respondents in Kola Diba, 2017

| <b>Variable</b>                           |                     | <b>Frequency (n)</b> | <b>Percent (%)</b> |
|-------------------------------------------|---------------------|----------------------|--------------------|
| <b>Housing structure</b>                  | Made of mud and hut | 240                  | 92.3               |
|                                           | Made of cement      | 20                   | 7.7                |
| <b>Number of room</b>                     | 1                   | 45                   | 17.3               |
|                                           | 2                   | 101                  | 38.8               |
|                                           | 3                   | 83                   | 31.9               |
|                                           | >3                  | 31                   | 11.9               |
| <b>Number of bed</b>                      | 1                   | 36                   | 13.8               |
|                                           | 2                   | 136                  | 52.3               |
|                                           | 3                   | 66                   | 25.4               |
|                                           | >3                  | 22                   | 8.5                |
| <b>Number of bed net in the household</b> | 1                   | 60                   | 23.1               |
|                                           | 2                   | 109                  | 41.9               |
|                                           | 3                   | 84                   | 32.3               |
|                                           | >3                  | 7                    | 2.7                |
