# Supplementary material for: Utilization of insecticide treated bed net and associated factors among households of Kola Diba town, North Gondar, Amhara region, Ethiopia
Source: PubMed Central journal article supplement (PMC6090723; doi:10.1186/s13104-018-3697-7), 2018-08-13
Supplement: 13104_2018_3697_MOESM3_ESM.pdf [file 13104_2018_3697_MOESM3_ESM.pdf]

Table S2: Decision making, prioritization and seasonal variation in bednet utilization in Kola Diba, 2017

| Variables                       |                   | Decision making and prioritization in using bed net |            |
|---------------------------------|-------------------|-----------------------------------------------------|------------|
|                                 |                   | Yes                                                 | No         |
| <b>Decision maker</b>           | Father            | 154(59.2%)                                          | 106(40.8%) |
|                                 | mother            | 138(53.1%)                                          | 122(46.9%) |
| <b>Priority for bed net use</b> | Children          | 215(82.7%)                                          | 45(17.3%)  |
|                                 | Lactating mother  | 25(9.6%)                                            | 235(90.4%) |
|                                 | Pregnant mother   | 153(58.8%)                                          | 107(41.2%) |
|                                 | Head of household | 11(4.2%)                                            | 249(95.8%) |
| <b>Season</b>                   | Summer            | 248(95.4%)                                          | 3(1.2%)    |
|                                 | Autumn            | 178(68.5%)                                          | 82(31.5%)  |
|                                 | Winter            | 165(63.5%)                                          | 95(36.5%)  |
|                                 | spring            | 166(63.8%)                                          | 94(8.1%)   |
