# Supplementary material for: Utilization of insecticide treated bed net and associated factors among households of Kola Diba town, North Gondar, Amhara region, Ethiopia
Source: PubMed Central journal article supplement (PMC6090723; doi:10.1186/s13104-018-3697-7), 2018-08-13
Supplement: 13104_2018_3697_MOESM4_ESM.pdf [file 13104_2018_3697_MOESM4_ESM.pdf]

Table S3: Source and price of bed net

| <b>variable</b>                 |                 | <b>Frequency (n)</b> | <b>Percent (%)</b> |
|---------------------------------|-----------------|----------------------|--------------------|
| <b>Source of ITN</b>            | Government      | 258                  | 99.2               |
|                                 | Super market    | 1                    | 0.4                |
|                                 | Other           | 1                    | 0.4                |
| <b>Price of ITN</b>             | Free            | 255                  | 98.1               |
|                                 | <50 birr        | 5                    | 1.9                |
| <b>Ways of ITN distribution</b> | Family size     | 198                  | 76.2               |
|                                 | Number of rooms | 19                   | 7.3                |
|                                 | Number of beds  | 34                   | 13.1               |
|                                 | Other           | 9                    | 3.5                |
| <b>total</b>                    |                 | 260                  | 100                |
